# Supplementary figures and images for: How the insect central complex could coordinate multimodal navigation
Source: eLife journal article supplement (doi:10.7554/elife.73077), 2021-12-09

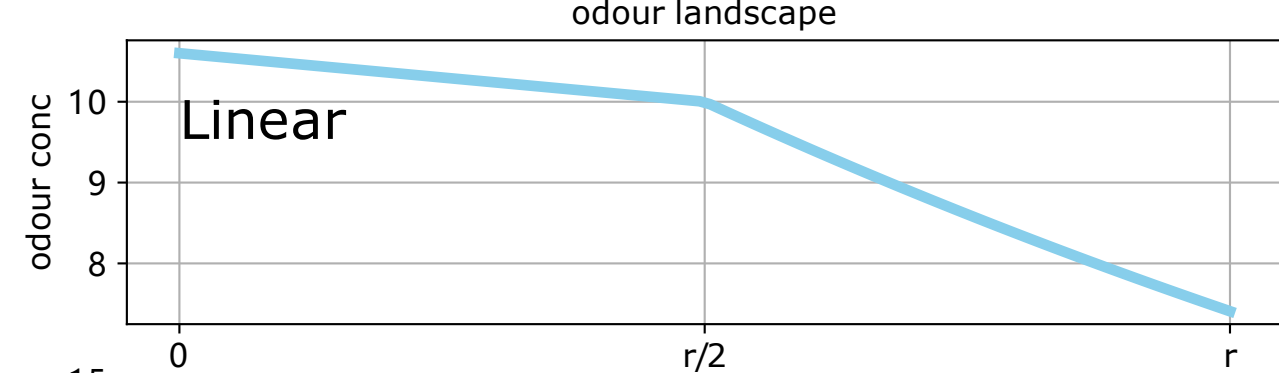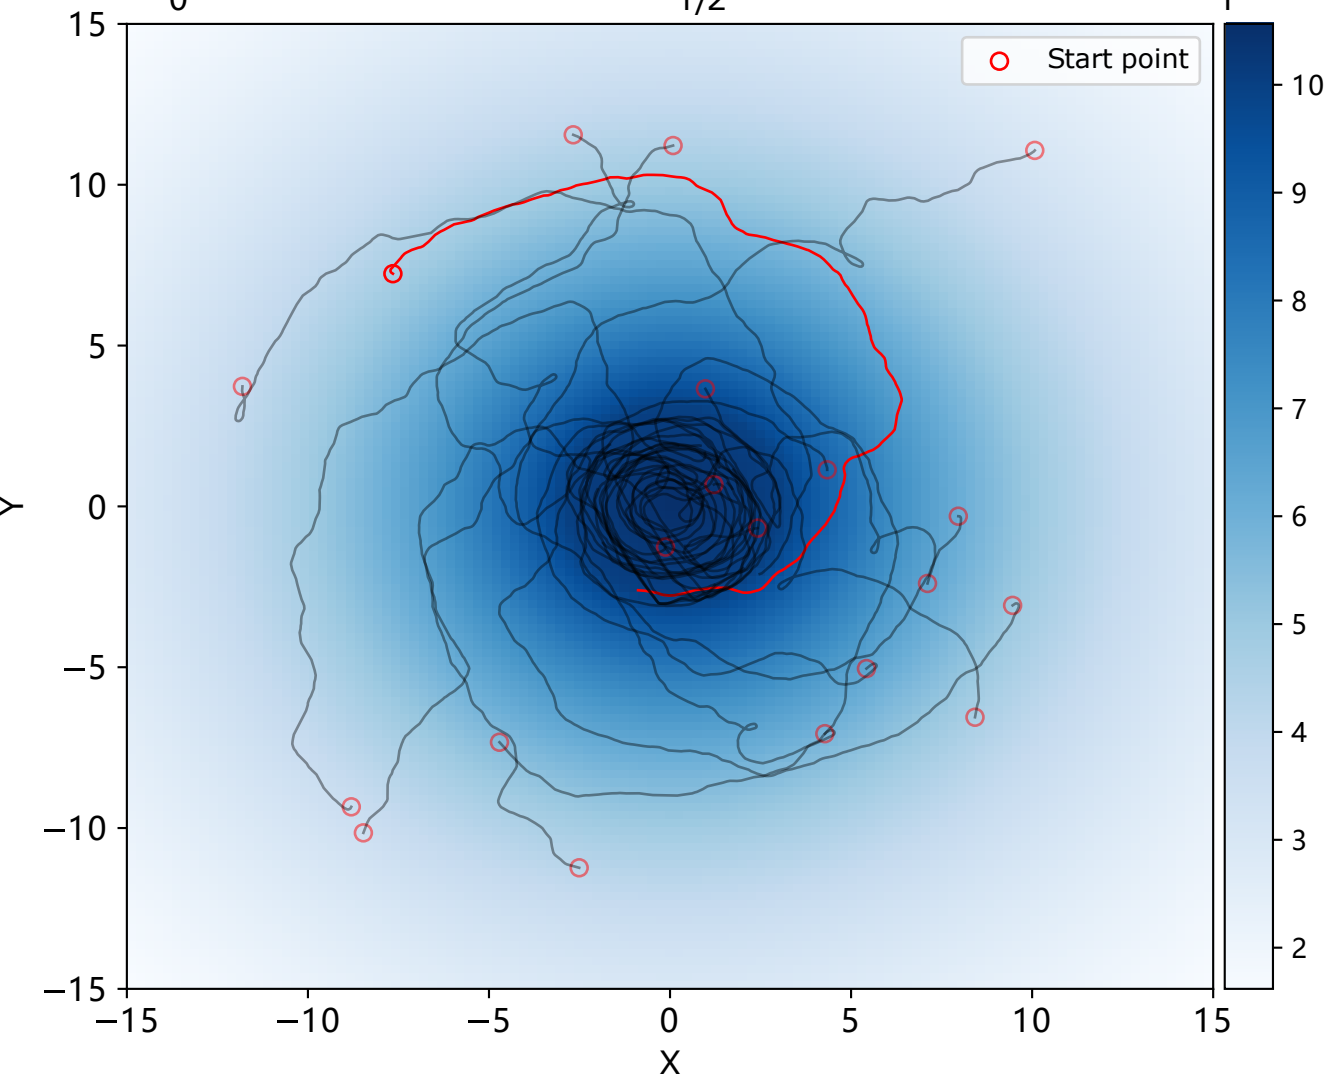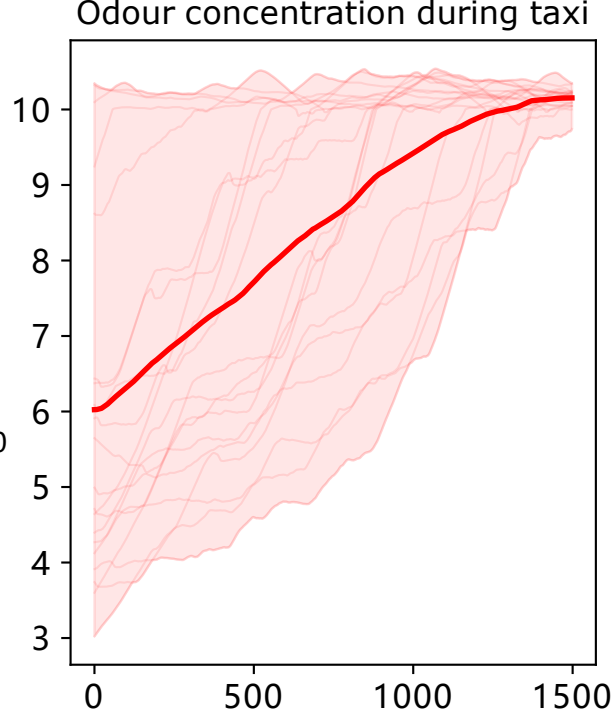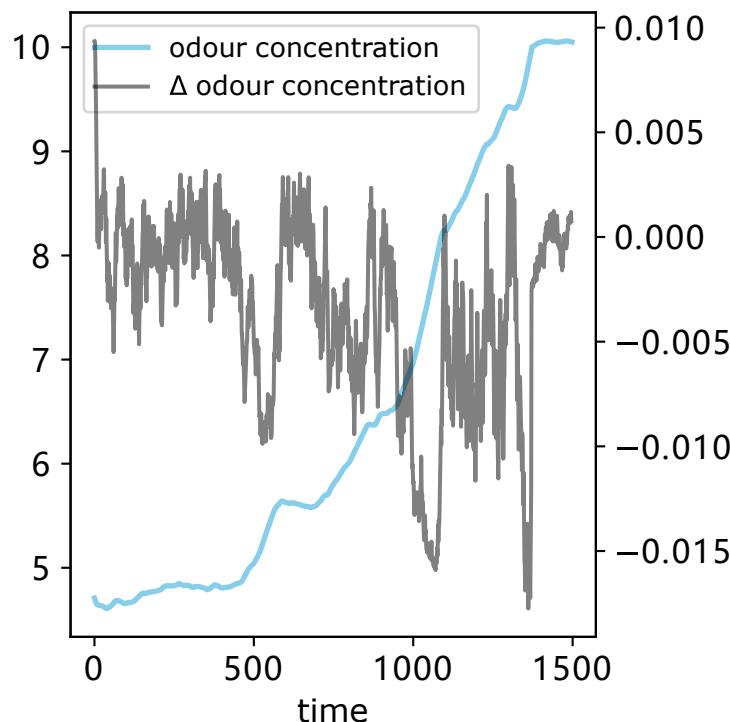

Supplement: supp [file elife-73077-supp-v1.zip]

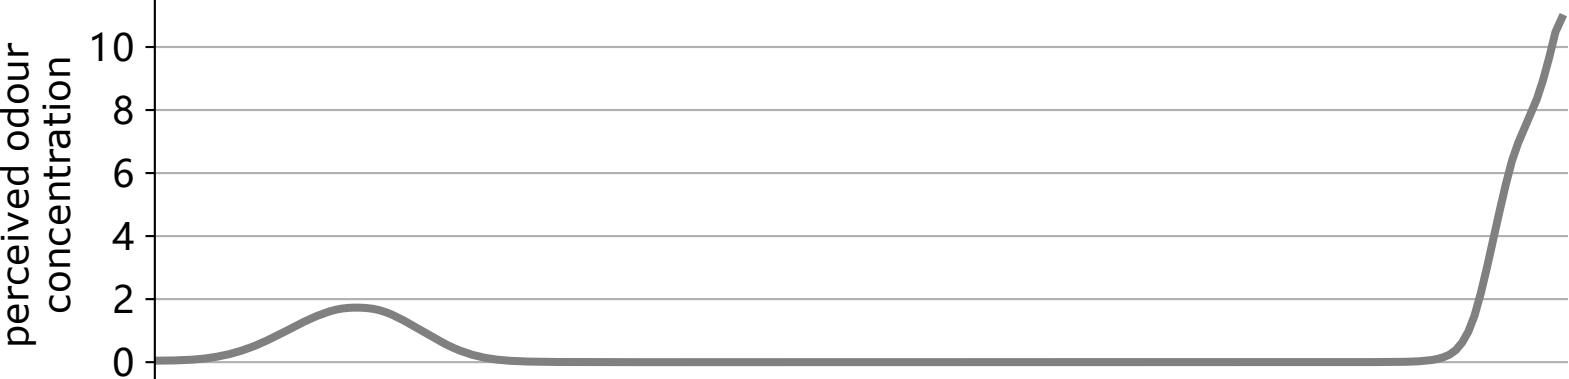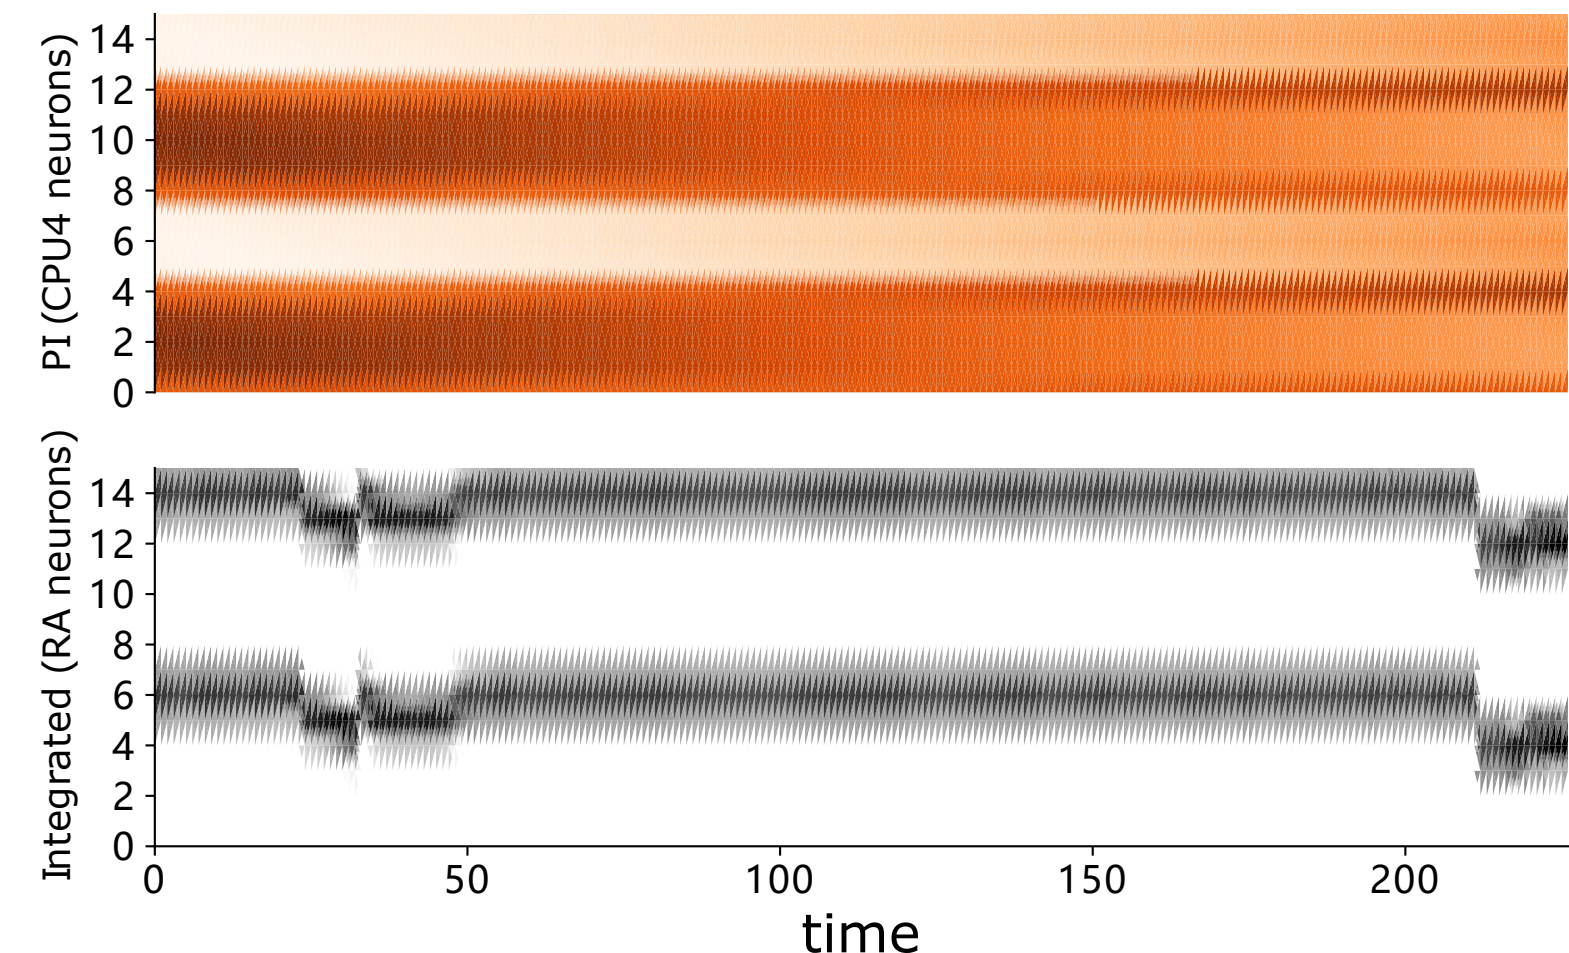

Supplement: supp [file elife-73077-supp-v1.zip]

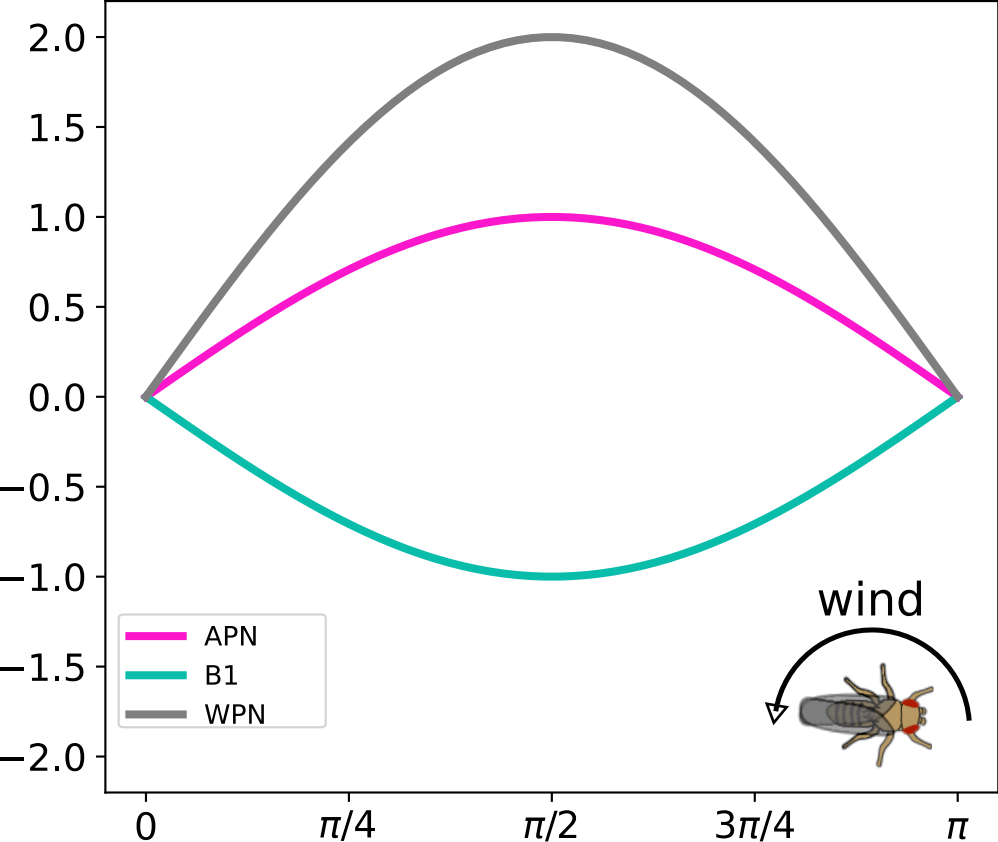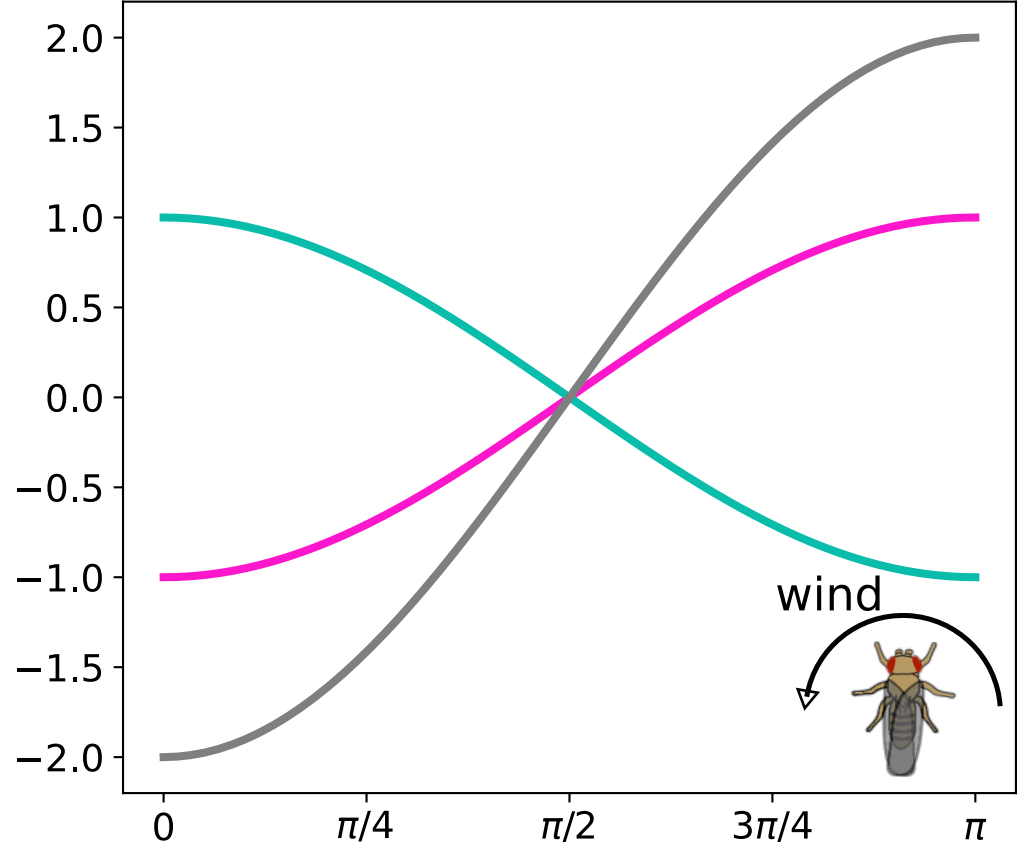

Supplement: supp [file elife-73077-supp-v1.zip]

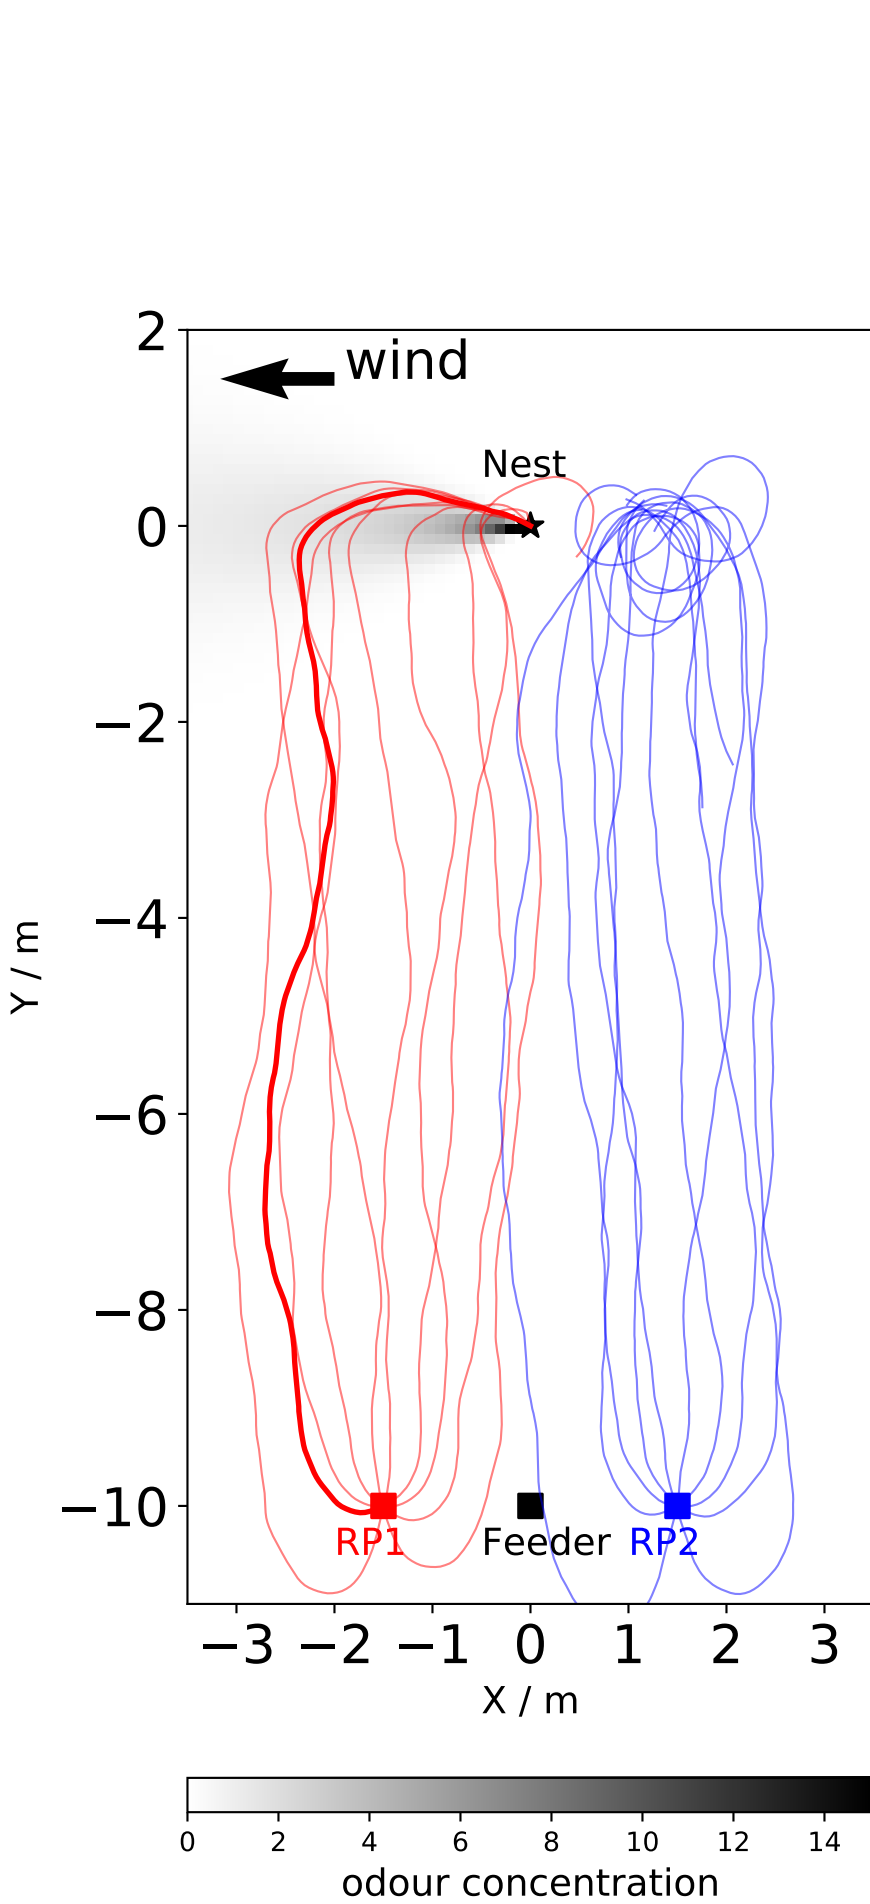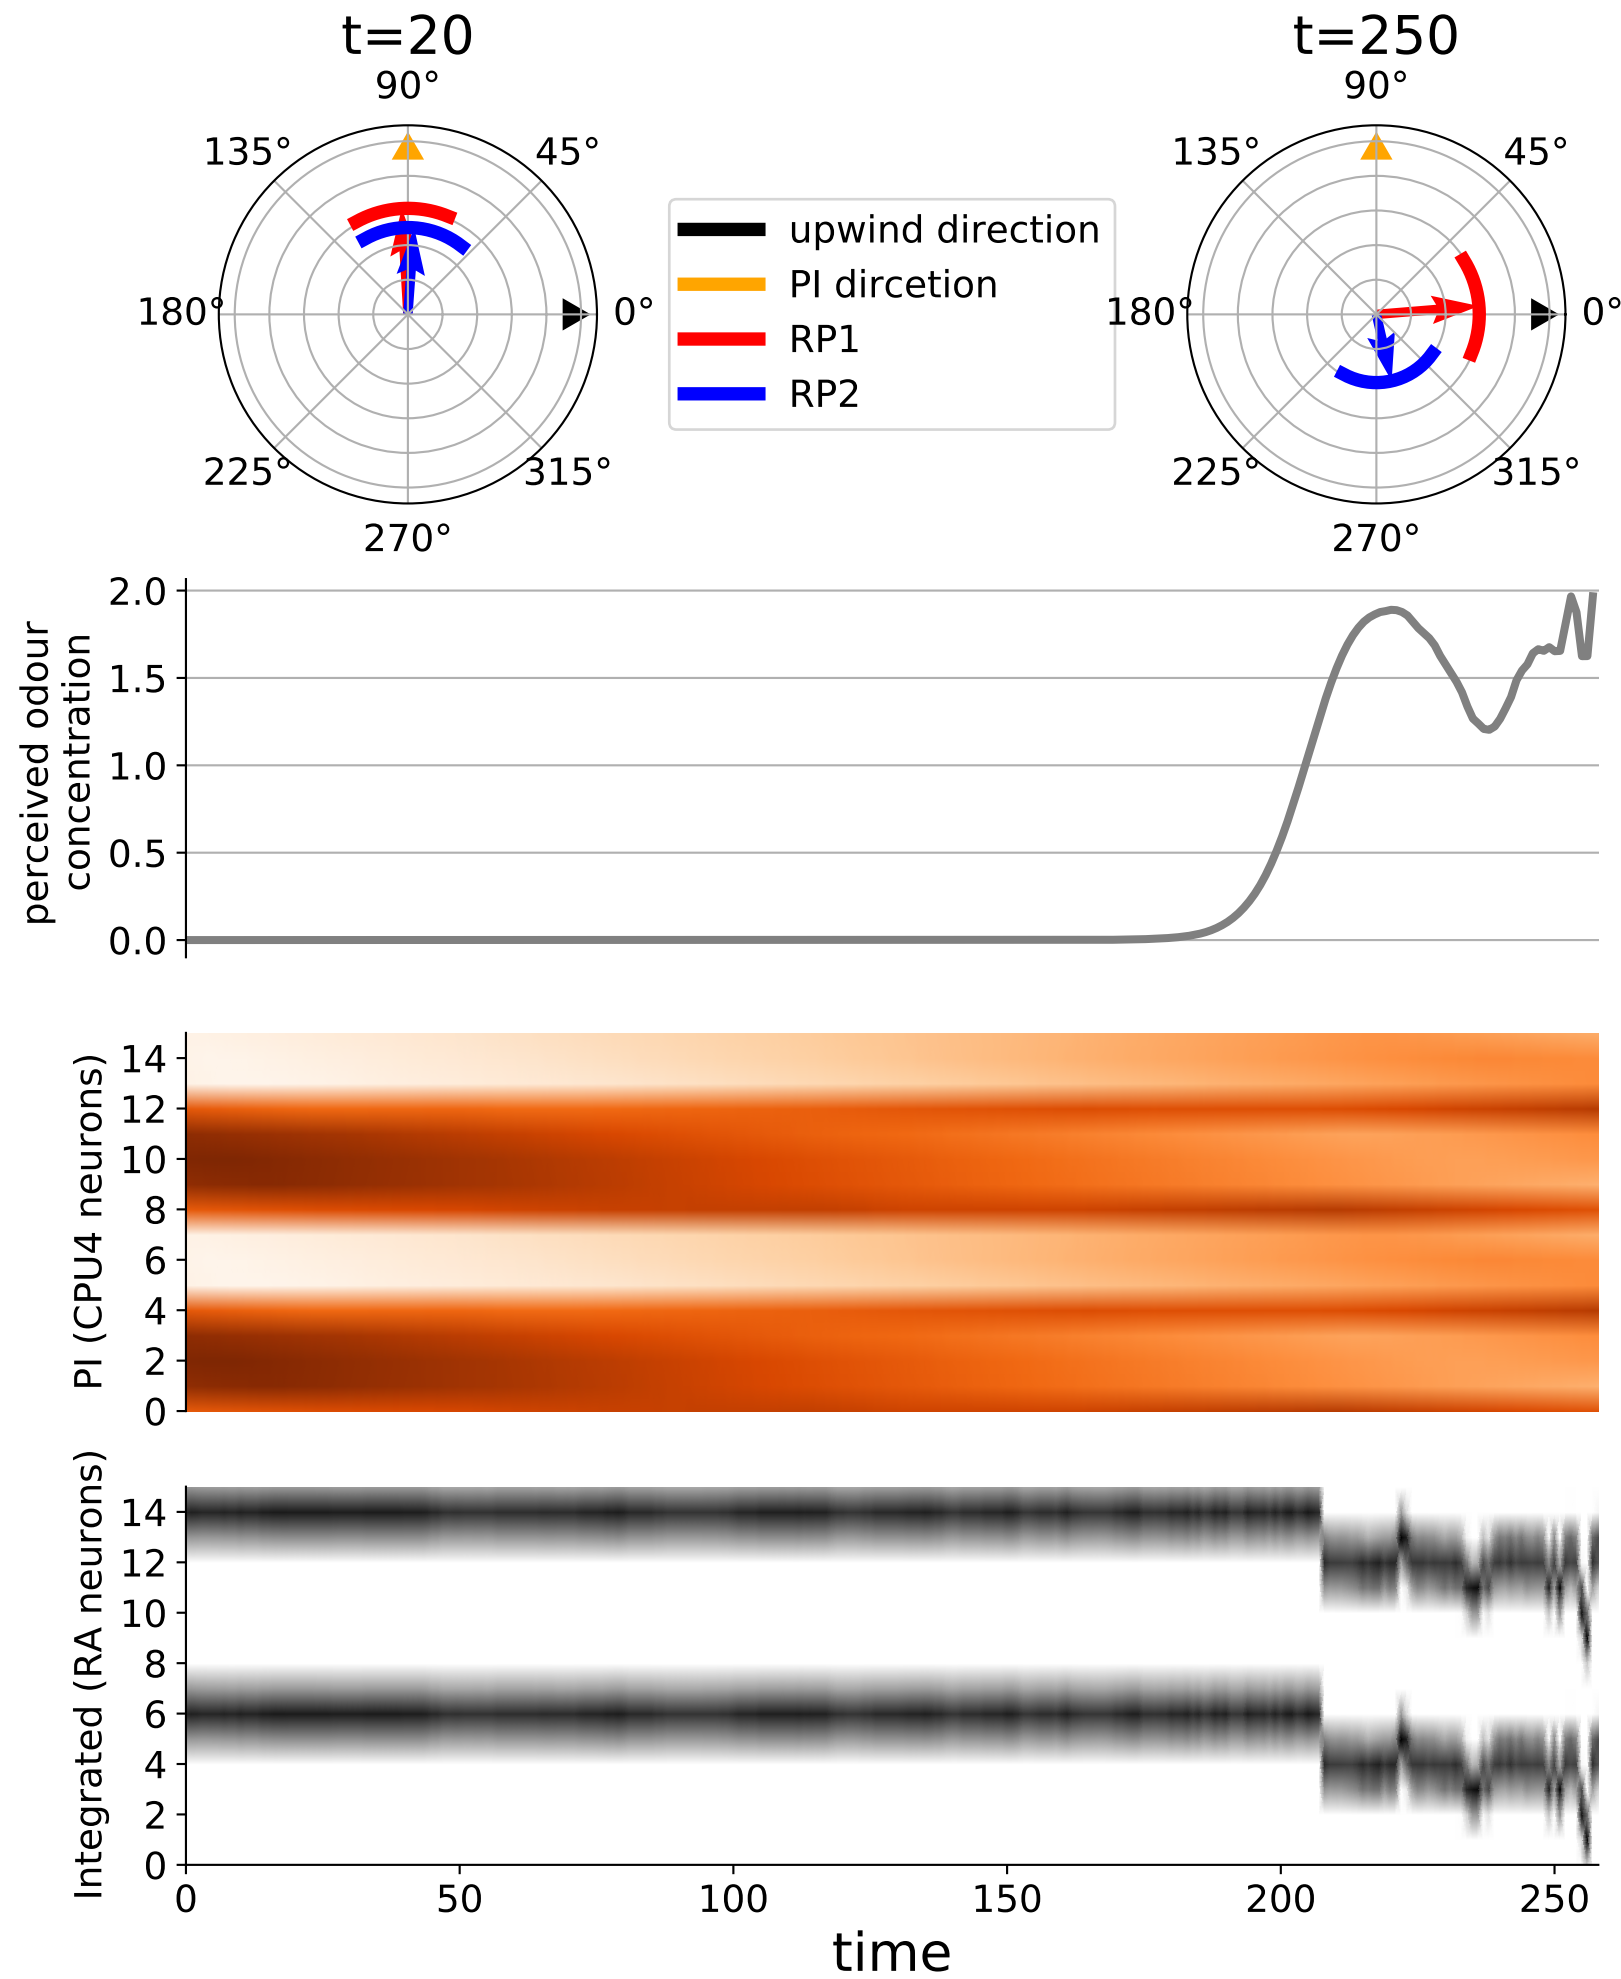

Supplement: supp [file elife-73077-supp-v1.zip]

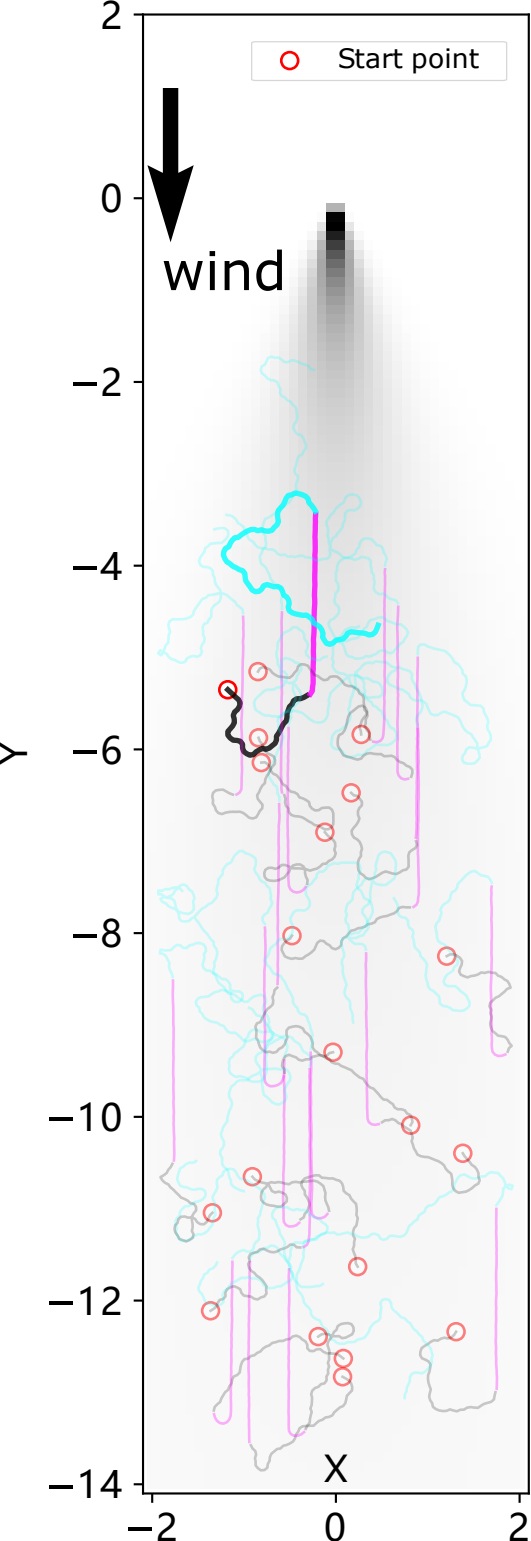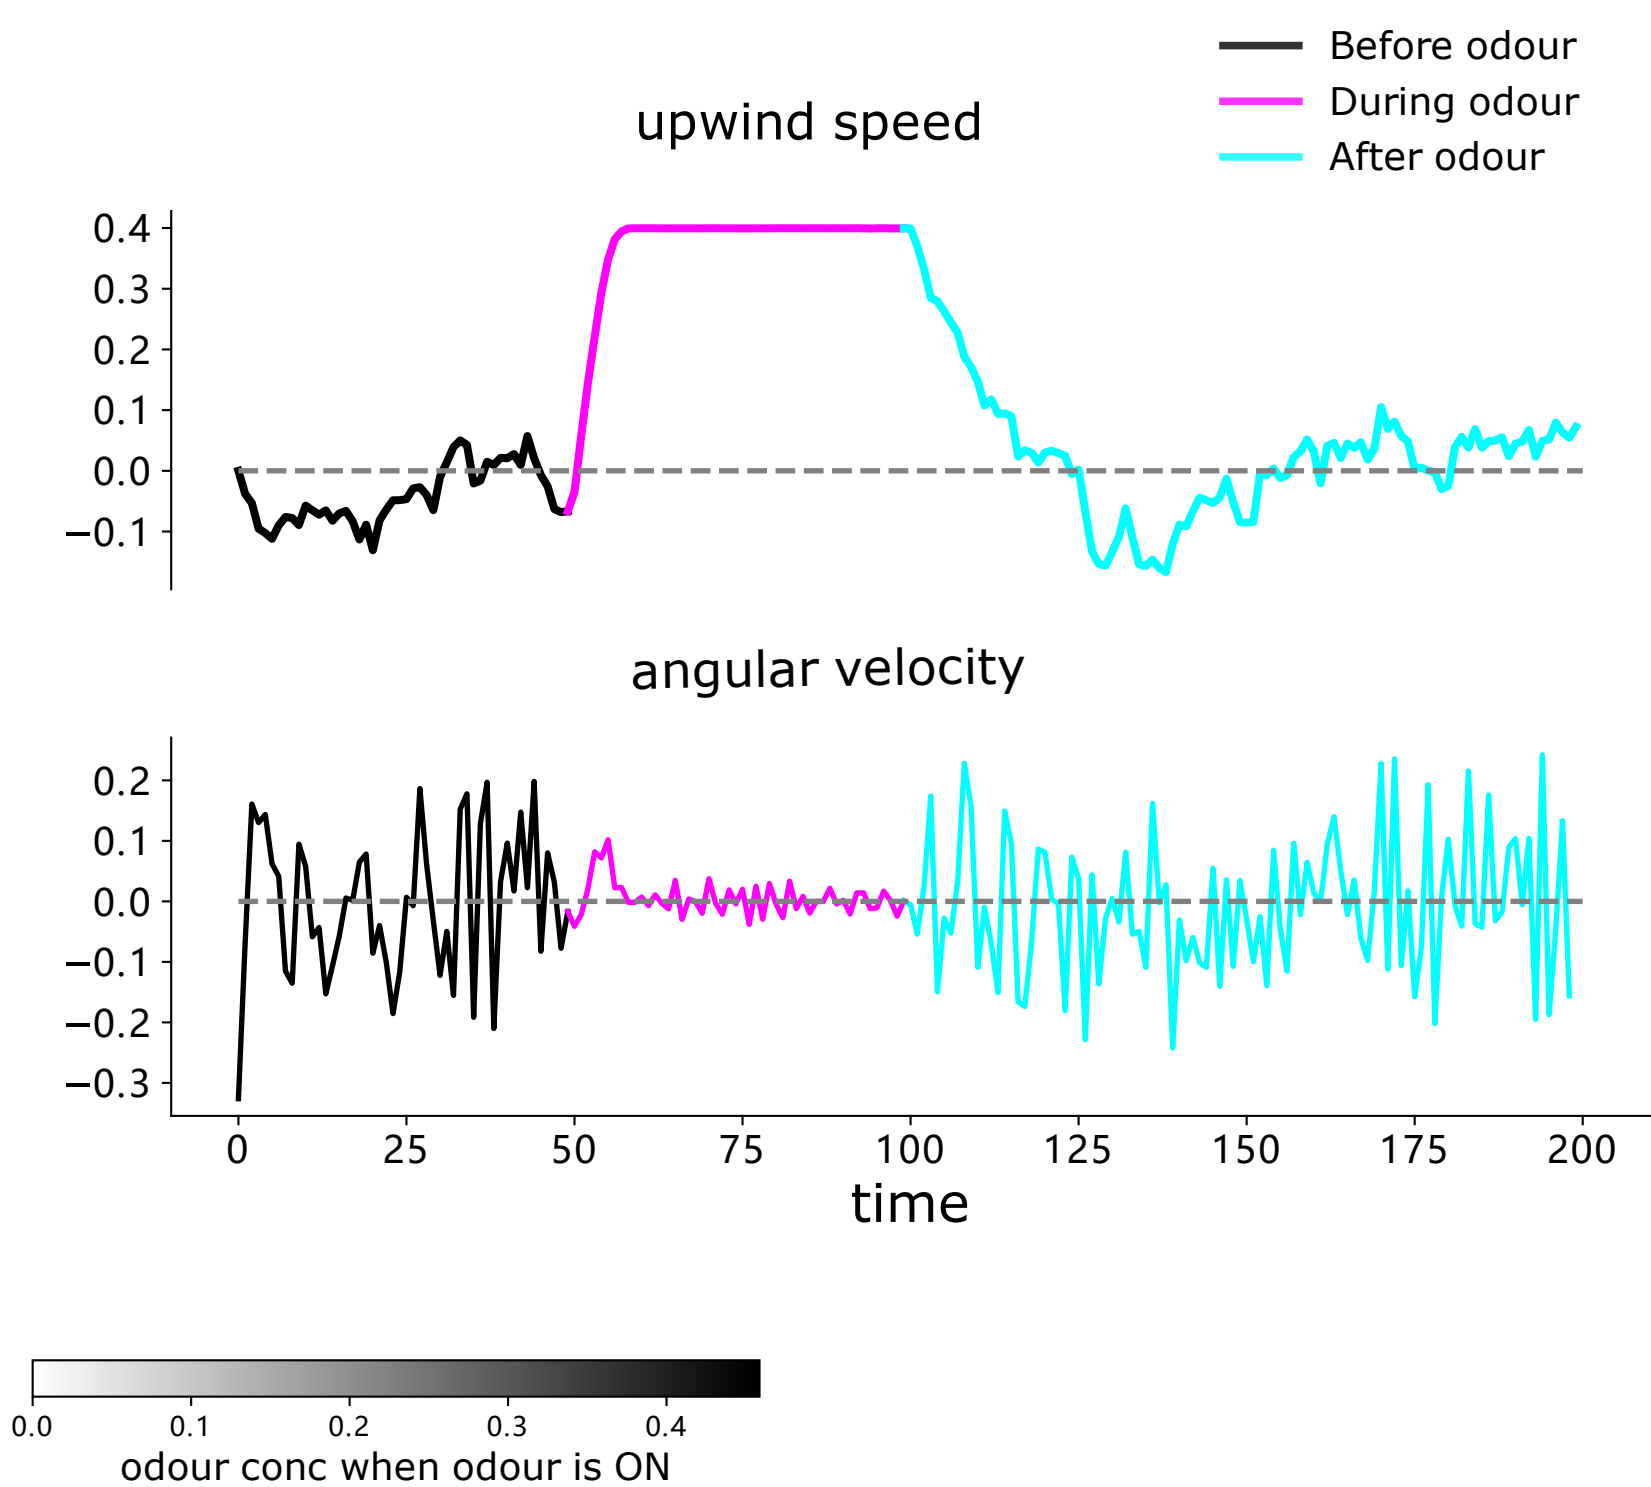

Supplement: supp [file elife-73077-supp-v1.zip]

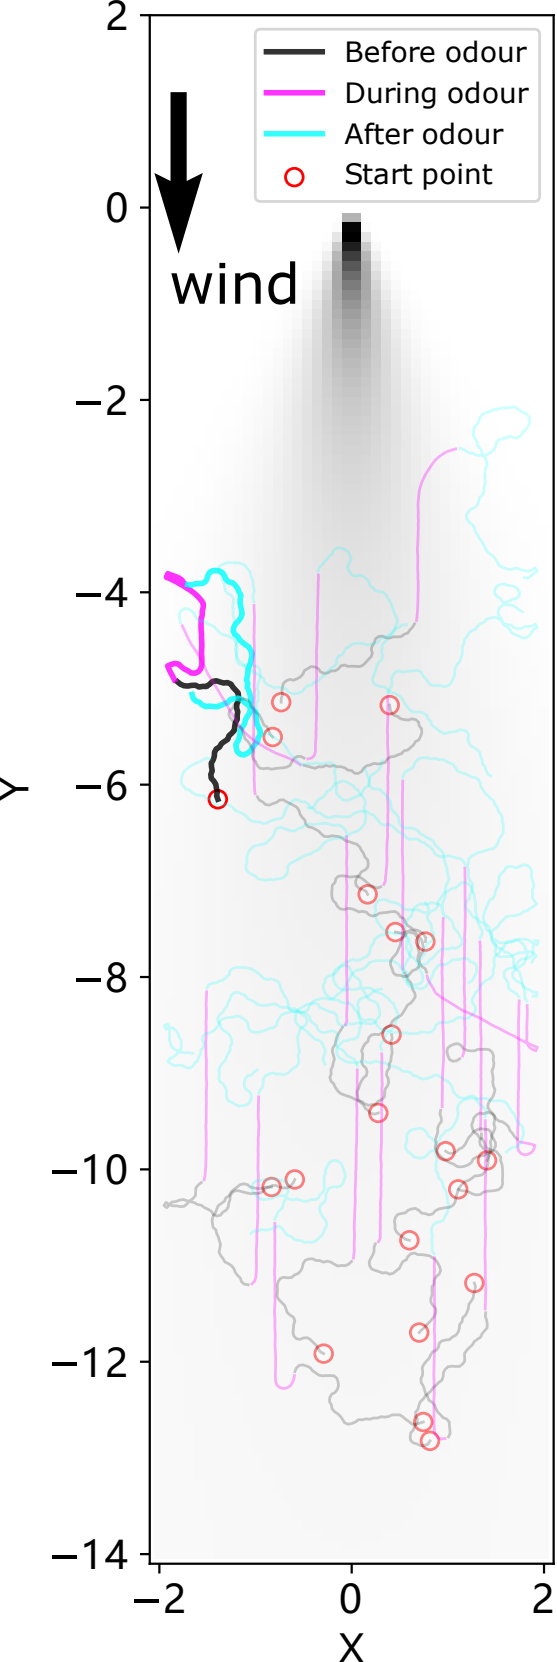

Before odour  
During odour  
After odour  
Start point

odour conc when odour is ON

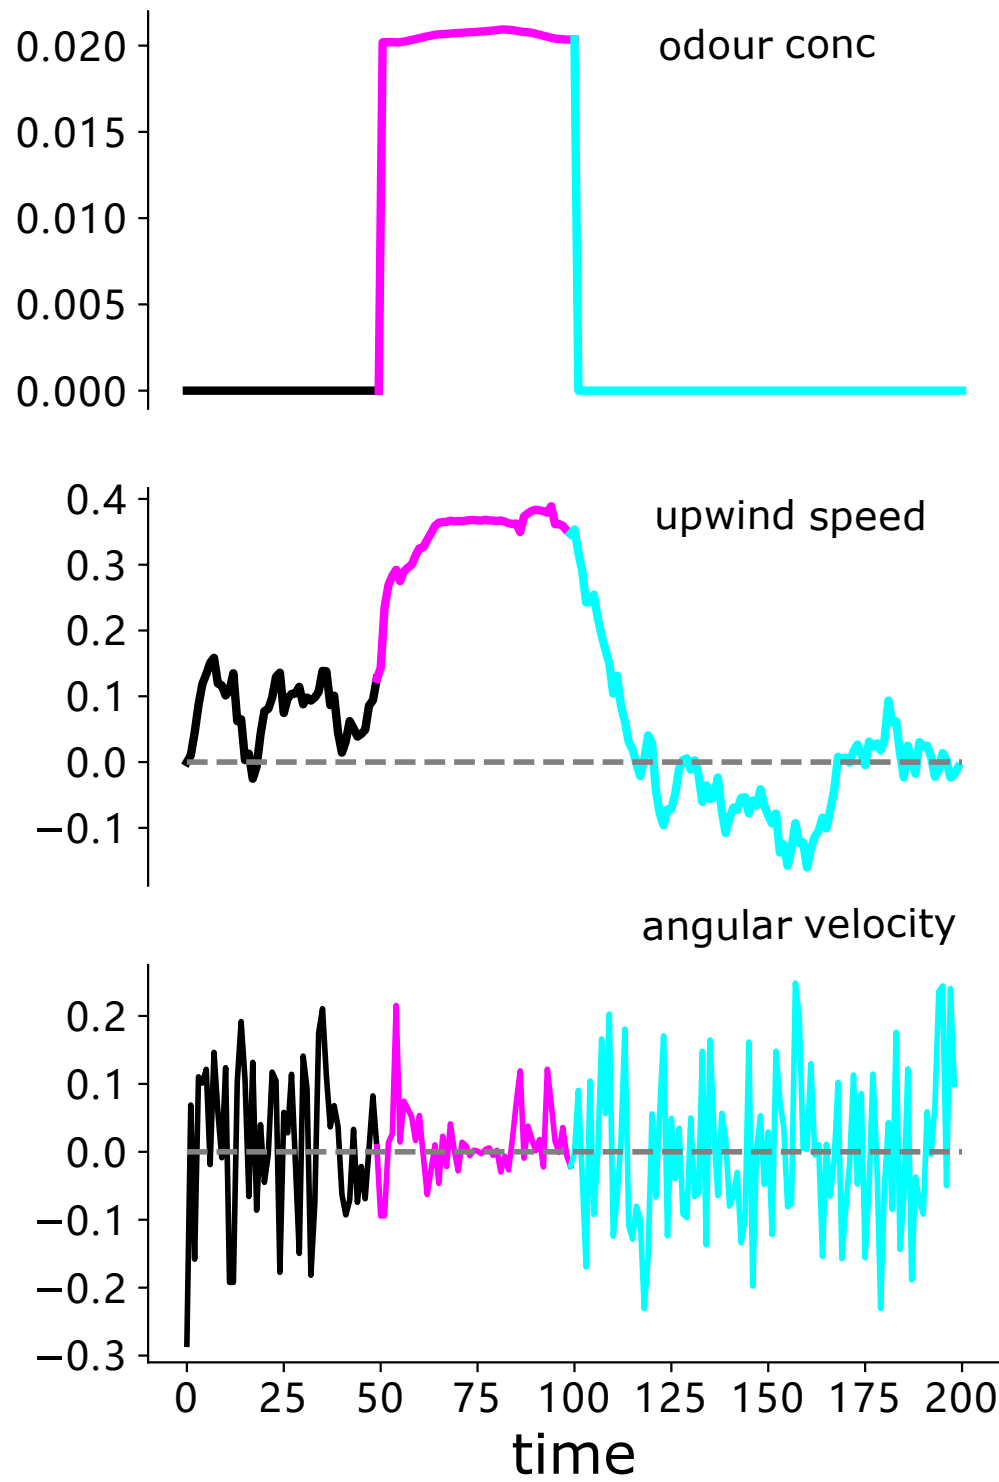

Supplement: supp [file elife-73077-supp-v1.zip]
